# Supplementary material
Source: MDPI journal article supplement (https://www.mdpi.com/2073-4433/9/8/305)
Supplement: s1 [file s1]

## Sheet: Table S1
Table S1 - Summary of the temporal variability in BA, chl.a, BP, PP and N2 fixation in the coastal water of Tel-Shikmona, Haifa, Israel between April 2013 to September 2017
during typical-non dust storm days. Corresponding figures are presented in the main manuscript file. N.A = not available
Date	Bacterial abundance (cells ml-1)	Chlorophyll.a (µg L-1)		BP (µg C L-1 d-1)		PP (µg C L-1 d-1)		N2 fixation (nmol N L-1 d-1)
		AVG	SD	AVG	SD	AVG	SD	AVG	SD
4/23/2013	430000	0.24	0.02	0.69	0.12	3.19	0.16	N.A	N.A
2013-03-05	N.A	0.19	0.04	0.76	0.18	2.5	0.5	N.A	N.A
2013-05-05	507000	0.14	0.01	0.68	0.07	3.4	0.46	N.A	N.A
5/13/2013	472000	0.14	0.02	0.61	0.11	2.91	0.19	N.A	N.A
5/21/2013	590000	0.12	0.02	0.7	0.09	2.19	0.08	0.27	0.09
5/29/2013	560000	0.16	0.02	0.87	0.08	2.18	0.32	N.A	N.A
6/19/2013	660000	0.17	0.02	1.21	0.09	1.8	0.19	0.47	0.08
6/25/2013	690000	0.16	0.03	1.13	0.12	2.01	0.14	0.37	0.08
2013-02-07	840000	0.13	0.01	1.33	0.07	2.33	0.34	0.35	0.06
2013-07-07	690000	0.11	0.01	N.A	N.A	2.06	0.39	N.A	N.A
7/24/2013	652000	0.1	0.02	0.93	0.19	1.94	0.6	N.A	N.A
7/30/2013	712000	0.11	0.01	0.82	0.18	1.87	0.72	N.A	N.A
8/13/2013	747000	0.12	0.02	1.04	0.09	1.58	0.48	0.3	0.07
8/20/2013	872000	0.11	0.01	1.04	0.02	1.64	0.23	0.31	0.05
8/27/2013	803000	0.1	0.01	0.91	0.01	1.82	0.63	N.A	N.A
2013-03-09	848000	0.16	0.03	1.03	0.04	2.09	0.59	N.A	N.A
2013-09-09	710000	0.22	0.01	0.75	0.05	2.12	0.28	0.24	0.04
9/23/2013	757000	0.23	0.02	0.82	0.02	2.07	0.41	N.A	N.A
9/29/2013	788000	0.29	0.02	0.88	0.08	2.16	0.66	N.A	N.A
2013-03-10	692000	N.A	N.A	0.67	0.17	N.A	N.A	0.22	0.07
2013-06-10	590000	N.A	N.A	0.8	0.16	N.A	N.A	N.A	N.A
2013-07-10	563000	0.3	0.01	0.69	0.14	1.95	0.21	N.A	N.A
10/17/2013	607000	0.24	0.04	0.55	0.06	1.86	0.2	N.A	N.A
10/20/2013	550000	0.25	0.03	0.65	0.16	2.06	0.37	N.A	N.A
2013-12-11	430000	0.24	0.04	0.48	0.05	1.86	0.55	N.A	N.A
11/27/2013	510000	0.31	0.05	0.47	0.07	2.83	0.58	N.A	N.A
2013-01-12	471000	0.32	0.04	0.49	0.08	3.03	0.33	0.19	0.05
2013-08-12	467000	0.38	0.07	0.47	0.06	3.38	0.41	0.19	0.05
12/16/2013	519000	0.59	0.04	0.51	0.08	3.89	0.36	0.25	0.03
12/31/2013	570000	0.48	0.08	0.69	0.17	5.2	1.81	0.21	0.09
2014-05-01	558000	0.44	0.08	0.47	0.08	5.72	0.96	N.A	N.A
1/15/2014	561000	0.52	0.03	0.73	0.16	7.04	1.44	N.A	N.A
1/20/2014	650000	0.48	0.02	0.75	0.15	6.5	1.05	N.A	N.A
1/26/2014	535000	0.51	0.02	0.84	0.12	7.56	2.18	0.39	0.07
1/29/2014	503000	0.6	0.03	0.6	0.19	3.65	0.47	N.A	N.A
2014-11-02	690000	0.43	0.02	0.83	0.18	4.95	0.62	N.A	N.A
2014-12-02	710000	0.41	0.01	0.84	0.15	5.62	1.28	N.A	N.A
2/17/2014	670000	0.46	0.02	0.98	0.29	6.12	0.57	0.36	0.1
2/25/2014	600000	0.58	0.02	1.19	0.13	11.42	2.93	N.A	N.A
2014-02-04	770000	0.28	0.03	0.94	0.12	6.74	1.17	N.A	N.A
4/22/2014	780000	0.26	0.05	0.88	0.11	6.47	1.45	0.23	0.05
2014-11-05	790000	0.27	0.02	0.57	0.08	3.41	0.52	0.15	0.08
2014-12-05	700000	0.22	0.03	0.65	0.14	2.79	0.29	0.14	0.07
5/13/2014	730000	0.21	0.03	0.86	0.31	2.14	0.58	0.19	0.08
5/28/2014	630000	0.24	0.02	0.78	0.19	2.51	0.8	0.18	0.04
6/22/2014	500000	0.17	0.04	0.81	0.17	1.54	0.56	0.38	0.06
8/24/2014	N.A	0.23	0.04	0.59	0.13	1.83	0.15	0.4	0.08
9/29/2014	510000	0.28	0.02	0.52	0.11	1.44	0.21	0.26	0.1
2014-07-10	610000	0.26	0.01	0.68	0.18	2.54	0.29	0.26	0.07
10/15/2014	620000	0.31	0.02	0.71	0.05	2.58	0.26	0.09	0.02
2014-03-11	590000	0.3	0.02	0.62	0.15	2.95	0.47	0.15	0.01
11/20/2014	640000	0.33	0.01	0.628333	0.177083	3.65	0.22	0.14	0.04
12/16/2014	N.A	N.A	N.A	0.8	0.2	1.27	0.02	N.A	N.A
12/17/2014	N.A	N.A	N.A	0.5125	0.0625	1.83	0.47	N.A	N.A
1/13/2015	580000	0.33	0.02	1.06917	0.0970833	2.91	0.19	0.24	0.09
2015-04-02	600000	0.34	0.02	0.670417	0.227917	3.55	0.27	0.29	0.01
4/19/2015	560000	0.26	0.01	0.60625	0.118333	1.73	0.29	N.A	N.A
5/20/2015	820000	0.29	0.02	0.840833	0.1525	2.23	0.55	N.A	N.A
6/21/2015	930000	0.29	0.06	0.73	0.155	2.84	0.39	N.A	N.A
7/14/2015	N.A	N.A	N.A	1.79259	0.354255	0.61	0.09	N.A	N.A
7/15/2015	N.A	N.A	N.A	1.48954	0.215085	0.73	0.14	N.A	N.A
7/16/2015	N.A	N.A	N.A	1.52166	0.227986	0.73	0.13	N.A	N.A
7/18/2015	N.A	N.A	N.A	0.98765	0.0923129	1.04	0.28	N.A	N.A
7/19/2015	N.A	N.A	N.A	0.331994	0.0400015	0.58	0.12	N.A	N.A
7/21/2015	N.A	N.A	N.A	0.376081	0.0659781	1.25	0.14	N.A	N.A
7/22/2015	N.A	N.A	N.A	0.932511	0.320954	1.24	0.19	N.A	N.A
8/26/2015	720000	0.15	0.03	0.2725	0.179167	1.08	0.33	N.A	N.A
2015-06-09	850000	0.19	0.02	0.215833	0.0629167	0.99	0.21	0.22	0.08
10/26/2015	740000	0.26	0.07	0.402083	0.06	3.65	0.51	0.26	0.06
11/22/2015	810000	0.31	0.02	0.41625	0.0425	3.82	0.54	N.A	N.A
11/28/2015	1500000	0.41	0.01	0.774583	0.125417	8.82	1.04	N.A	N.A
11/19/2015	1200000	0.39	0.02	0.51125	0.0925	5.98	0.83	N.A	N.A
12/21/2015	530000	0.32	0.15	0.44	0.11	5.09	0.54	N.A	N.A
1/21/2016	600000	0.24	0.07	0.374583	0.0529167	5.69	0.82	N.A	N.A
2016-10-02	640000	0.23	0.02	0.44	0.17	3.99	0.41	N.A	N.A
3/20/2016	571000	0.25	0.02	0.65	0.15	5.21	0.41	N.A	N.A
2016-10-04	560000	0.26	0.01	0.62	0.14	7.58	1.12	N.A	N.A
2016-09-05	1200000	0.22	0.02	0.675833	0.1525	1.14	0.18	N.A	N.A
6/15/2016	820000	0.28	0.03	0.68	0.095	1.58	0.65	0.24	0.04
7/14/2016	707000	0.19	0.04	0.75	0.14	1.32	0.15	0.22	0.06
8/21/2016	710000	0.19	0.03	0.5675	0.163333	2.54	0.62	N.A	N.A
9/18/2016	790000	0.16	0.02	0.535417	0.0829167	2.17	0.51	N.A	N.A
10/19/2016	730000	0.2	0.05	0.484167	0.0866667	3.33	0.19	0.3	0.1
11/16/2016	710000	0.24	0.04	0.616667	0.105417	3.08	0.46	0.28	0.1
11/29/2016	1.7e+06	0.26	0.02	1.1175	0.182917	2.75	0.54	0.26	0.1
11/30/2016	910000	0.27	0.03	0.675	0.130833	3.01	0.41	N.A	N.A
2016-04-12	930000	0.29	0.05	0.680833	0.16125	4.41	0.82	N.A	N.A
2016-05-12	890000	0.3	0.05	0.745	0.18375	5.01	1.1	N.A	N.A
2016-09-12	920000	0.31	0.02	0.588333	0.0770833	2.52	0.44	N.A	N.A
2017-04-01	650000	0.36	0.07	0.663333	0.164167	8.95	1.66	N.A	N.A
2017-05-02	720000	0.35	0.02	0.68	0.172917	10.36	2.71	N.A	N.A
2017-02-03	520000	0.34	0.02	0.519583	0.0604167	9.12	0.96	0.3	0.04
3/13/2017	520000	0.38	0.03	0.567917	0.127917	7.09	1.73	0.34	0.1
2017-02-04	600000	0.42	0.04	0.590417	0.106667	9.21	1.05	N.A	N.A
5/17/2017	420000	0.24	0.04	0.827083	0.11	3.96	0.63	0.52	0.14
5/21/2017	620000	0.32	0.03	0.837083	0.122917	4.54	0.65	N.A	N.A
6/26/2017	820000	0.21	0.04	0.980833	0.130833	3.49	0.17	N.A	N.A
7/23/2017	790000	0.23	0.02	0.912083	0.120417	3.13	0.54	N.A	N.A
2017-11-08	890000	0.2	0.02	1.20042	0.104583	1.99	0.61	N.A	N.A
2017-01-09	620000	0.2	0.03	1.03958	0.285	3.94	0.19	0.3	0.08
2017-09-10	420000	0.2	0.04	0.980063	0.152083	2.22	0.24	0.2	0.12

## Sheet: Table S2
Table S2 - Summary of the temporal variability in chl.a, BP, PP and N2 fixation in the coastal water of Tel-Shikmona, Haifa, Israel between
April 2013 to September 2017 during dusty days. Corresponding figures are presented in the main manuscript file. N.A = not available
Date	Bacterial abundance (cells ml-1)	Chlorophyll.a (µg L-1)		BP (µg C L-1 d-1)		PP (µg C L-1 d-1)		N2 fixation (nmol N L-1 d-1)
		AVG	SD	Avg	SD	AVG	SD	AVG	SD
2013-06-06	580000	0.13	0.03	1.04	0.06	1.79	0.29	N.A	N.A
2013-12-06	628000	0.14	0.01	1	0.07	1.88	0.4	N.A	N.A
2013-07-11	539000	0.24	0.04	0.55	0.12	1.96	0.1	N.A	N.A
12/26/2013	587000	0.49	0.06	0.65	0.19	5.71	0.85	N.A	N.A
2014-06-03	680000	0.38	0.02	0.88	0.14	9.27	0.44	N.A	N.A
2014-10-05	650000	0.26	0.02	0.69	0.06	3.465	0.319421	0.23	0.07
2015-01-01	520000	0.32	0.01	0.787917	0.1725	3.63	0.53	0.29	0.05
1/29/2015	570000	0.36	0.02	0.735417	0.245	3.93	0.32	0.35	0.07
2015-05-03	870000	0.23	0.02	0.812917	0.0925	2.51	0.17	0.35	0.04
2015-03-05	880000	0.25	0.04	0.707917	0.11625	2.14	0.26	N.A	N.A
2015-08-09	670000	0.16	0.03	0.933156	0.00499574	3.16	0.54	0.28	0.1
2015-08-09	870000	0.16	0.02	0.96374	0.00524799	N.A	N.A	N.A	N.A
2015-09-09	810000	0.18	0.01	1.27111	0.00345081	3.1	0.47	0.32	0.04
2015-09-09	790000	0.2	0.02	0.262215	0.00765178	N.A	N.A	N.A	N.A
2015-10-09	790000	0.21	0.02	0.266536	0.00649162	4.18	0.35	N.A	N.A
2015-10-09	790000	0.24	0.01	0.244593	0.000962259	N.A	N.A	N.A	N.A
2015-10-09	870000	0.2	0.02	1.25713	0.0134236	N.A	N.A	N.A	N.A
2015-11-09	770000	0.18	0.01	1.22874	0.0211782	3.5	0.32	0.38	0.1
2015-12-09	890000	0.17	0.03	0.235063	0.0219524	3.2	0.11	N.A	N.A
9/13/2015	750000	0.14	0.01	1.26389	0.0148741	2.34	0.31	0.36	0.08
11/24/2016	1.8e+06	0.45	0.08	1.23542	0.267083	9.62	3.34	0.48	0.12
11/25/2016	1.8e+06	0.43	0.02	0.998333	0.217917	11.82	2.79	0.46	0.16
11/27/2016	1600000	0.36	0.04	1.23792	0.26375	9.99	2.14	0.32	0.06
2017-01-03	600000	0.46	0.06	0.538333	0.0704167	12.63	1.71	0.26	0.08
2017-11-03	710000	0.49	0.05	0.7425	0.214167	10.84	1.96	0.4	0.08
2017-12-03	840000	0.46	0.03	0.78875	0.16625	12.73	2.18	0.6	0.18
5/19/2017	620000	0.32	0.02	1.11875	0.04875	5.02	0.52	0.62	0.14
2017-12-11	1100000	0.25	0.01	0.859522	0.289689	3.22	0.54	0.28	0.06
11/13/2017	990000	0.28	0.06	1.08841	0.256183	3.98	0.62	0.36	0.16
11/14/2017	1050000	0.23	0.02	0.87	0.08	3.51	0.22	0.34	0.12
